# Supplementary material
Source: Springer Nature journal article supplement (https://www.springermedizin.de/resource/supplementary/12913_2013_2856_MOESM3_ESM.pdf/9531684)
Supplement: MOESM3 [file 9531684]

Policy making  
(2007.07)

People with Disabilities  
Rights protection Act

ICF

CRPD

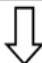

Phase I  
(2007.07~2009.12)

- Team building & meeting
- Developing assessment tools
- Field trial (n=500)

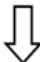

Phase II  
(2010.1~2012.6)

- Refine assessment tools
- Make sure of evaluation procedure
- Nationwide study (n=7,329)

Evaluation tool

Core set for disability  
determination

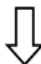

Phase III  
(2012.7~2013.3)

- Implementation (n=168,052)
- Monitor the condition after implementation
- Set up counseling groups

Procedure of disability  
evaluation

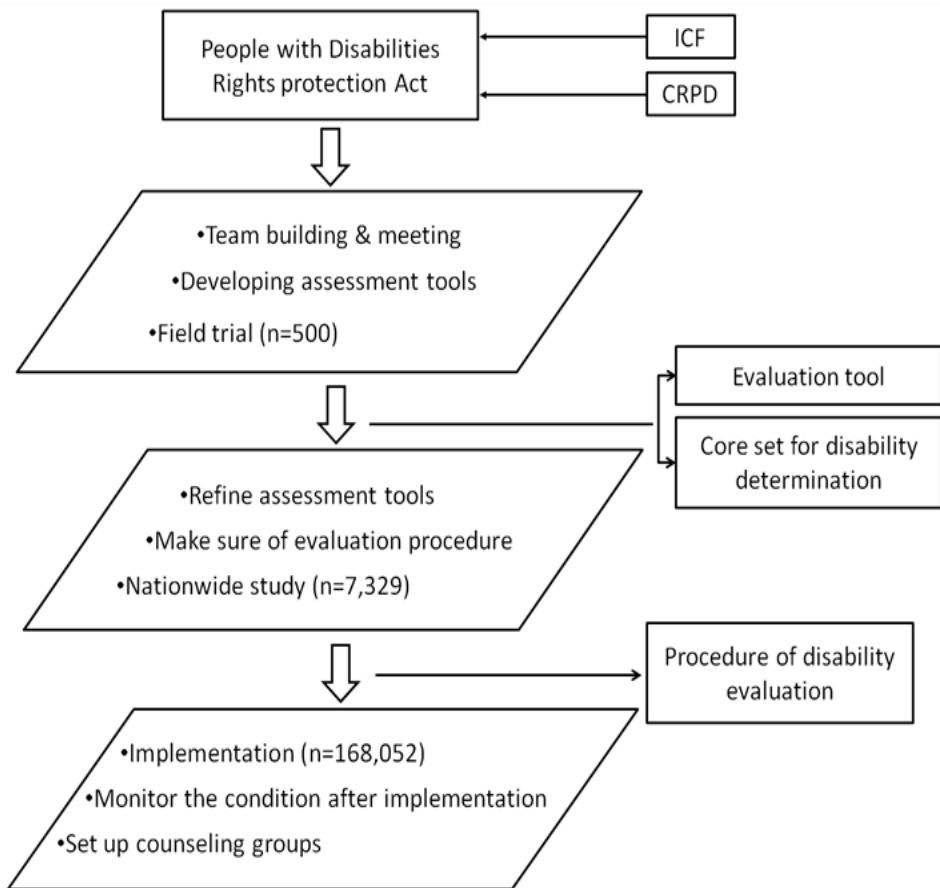

1
